# Supplementary material for: Evaluation of a Pharmacist-Led Penicillin Allergy Assessment Program and Allergy Delabeling in a Tertiary Care Hospital
Source: PubMed Central journal article supplement (PMC8120333; doi:10.1001/jamanetworkopen.2021.9820), 2021-05-13
Supplement: jamanetwopen-e219820-s001.pdf [file jamanetwopen-e219820-s001.pdf]

## Supplementary Online Content

Turner NA, Wrenn R, Sarubbi C, et al. Evaluation of a pharmacist-led penicillin allergy assessment program and allergy delabeling in a tertiary care hospital. *JAMA Netw Open*. 2021;4(5):e219820. doi:10.1001/jamanetworkopen.2021.9820

**eTable 1.** Antibiotic Classification

**eTable 2.** Summary of Covariates Used in Developing Logistic Regression Model Predictive of Penicillin Skin Testing

**eTable 3.** Interrupted Time Series Analysis of Antibiotic Use by Antibiotic Class

**eFigure 1.** Sensitivity Analysis of Interrupted Time Series Analysis of High CDI Risk Antibiotics

**eFigure 2.** Interrupted Time Series Analysis by Individual Antibiotic Classes

**eTable 4.** Interrupted Time Series Analysis of Hospital-Associated *C difficile* Rates

**eFigure 3.** Sensitivity Analysis for Potential Outlier Effect of October 2016-December 2016 HA-CDI Rates

**eFigure 4.** Distribution of Propensity Scores

**eTable 5.** Inpatient and Discharge Antibiotic Selection Analyzed by Penicillin Allergy Assessment Status

**eTable 6.** Inpatient and Outpatient Days of Therapy by Antibiotic and Penicillin Skin Testing Status

**eTable 7.** Cox Proportional Hazard Estimates

This supplementary material has been provided by the authors to give readers additional information about their work.

**eTable 1: Antibiotic Classification**

| Antibiotic Grouping                                                | Antibiotics Included                                                                                                                                                                                       |
|--------------------------------------------------------------------|------------------------------------------------------------------------------------------------------------------------------------------------------------------------------------------------------------|
| Penicillins                                                        | Amoxicillin, amoxicillin with clavulanate, ampicillin, ampicillin with sulbactam, dicloxacillin, nafcillin, oxacillin, penicillin, piperacillin with tazobactam, ticarcillin, ticarcillin with clavulanate |
| Early generation cephalosporin (1 <sup>st</sup> -2 <sup>nd</sup> ) | Cefaclor, cefadroxil, cefazolin, cefotetan, cefoxitin, cefprozil, cefuroxime, cephalexin                                                                                                                   |
| Late generation cephalosporin (3 <sup>rd</sup> -4 <sup>th</sup> )  | Cefdinir, cefditoren, cefepime, cefixime, cefotaxime, cefpodoxime, ceftaroline, ceftazidime, ceftazidime with avibactam, ceftibuten, ceftizoxime, ceftolozane with tazobactam, ceftriaxone                 |
| Fluoroquinolones                                                   | Ciprofloxacin, gemifloxacin, moxifloxacin, levofloxacin                                                                                                                                                    |
| Lincosamide                                                        | Clindamycin                                                                                                                                                                                                |
| Monobactam                                                         | Aztreonam                                                                                                                                                                                                  |
| Gram positive agents                                               | Vancomycin, daptomycin, dalbavancin, linezolid, tedizolid, oritavancin                                                                                                                                     |
| Carbapenem                                                         | Doripenem, ertapenem, imipenem, meropenem                                                                                                                                                                  |
| High risk for <i>C. difficile</i> infection                        | Cefdinir, cefepime, cefixime, cefotaxime, ceftazidime, ceftriaxone, ciprofloxacin, clindamycin, gemifloxacin, levofloxacin, moxifloxacin                                                                   |
| Macrolides                                                         | Azithromycin, clarithromycin                                                                                                                                                                               |
| Sulfa                                                              | Trimethoprim-sulfamethoxazole                                                                                                                                                                              |
| Tetracyclines                                                      | Doxycycline, tetracycline                                                                                                                                                                                  |
| Aminoglycosides                                                    | Amikacin, gentamicin, tobramycin, streptomycin                                                                                                                                                             |
| Other                                                              | Metronidazole, nitrofurantoin                                                                                                                                                                              |
| Non-penicillin Alternative Agents                                  | Aztreonam, ciprofloxacin, moxifloxacin, levofloxacin, clindamycin, amikacin, gemifloxacin, gentamicin, tobramycin, streptomycin                                                                            |
| Narrow spectrum beta-lactam agents                                 | Amoxicillin, amoxicillin-clavulanate, ampicillin, ampicillin-sulbactam, cefadroxil, cefazolin, cefotetan, cefoxitin, cephalexin, dicloxacillin, nafcillin, oxacillin, penicillin                           |

**eTable 2: Summary of covariates used in developing logistic regression model predictive of penicillin skin testing.**

| Variables                    | Multivariate Logistic Regression Modeling in Whole Cohort |         |                  |         |
|------------------------------|-----------------------------------------------------------|---------|------------------|---------|
|                              | For Penicillin Skin Testing                               |         | For HCFA CDI     |         |
|                              | OR (95% CI)                                               | P value | OR (95% CI)      | P value |
| Penicillin skin tested       | --                                                        | --      | 0.48 (0.14-1.21) | 0.17    |
| Age, per decade <sup>a</sup> | 0.97 (0.88-1.08)                                          | 0.63    | 1.17 (0.99-1.38) | 0.06    |
| Female                       | Ref                                                       | --      | Ref              | --      |
| Male                         | 1.31 (1.00-1.72)                                          | 0.05    | 0.67 (0.44-1.01) | 0.06    |
| Race                         |                                                           |         |                  |         |
| Black                        | Ref                                                       | --      | Ref              | --      |
| White                        | 1.30 (0.94-1.82)                                          | 0.12    | 0.92 (0.68-1.27) | 0.90    |
| Other                        | 0.78 (0.35-1.55)                                          | 0.49    | 0.84 (0.37-1.67) | 0.79    |
| Treating Service             |                                                           |         |                  |         |
| Medicine                     | Ref                                                       | --      | Ref              | --      |
| Oncology                     | 0.66 (0.35-1.19)                                          | 0.18    | 1.45 (0.59-3.31) | 0.40    |
| Surgery                      | 0.79 (0.58-1.08)                                          | 0.14    | 1.13 (0.73-1.74) | 0.57    |
| Infection Type               |                                                           |         |                  |         |
| Pneumonia                    | 1.00 (0.65-1.51)                                          | 0.99    | 1.18 (0.65-2.03) | 0.56    |
| UTI                          | 2.46 (1.17-4.67)                                          | 0.01    | 1.12 (0.27-3.10) | 0.85    |
| Endocarditis                 | 1.70 (0.79-3.46)                                          | 0.16    | 0.59 (0.03-2.97) | 0.62    |
| Bacteremia                   | 1.40 (1.02-1.92)                                          | 0.04    | 0.91 (0.52-1.54) | 0.74    |
| Osteomyelitis                | 1.47 (0.92-2.31)                                          | 0.10    | 0.35 (0.05-1.19) | 0.16    |
| Intra-abdominal              | 1.17 (0.70-1.87)                                          | 0.53    | 1.52 (0.80-2.69) | 0.17    |
| ABSSSI                       | 1.70 (1.18-2.41)                                          | <0.01   | 0.93 (0.42-1.82) | 0.85    |
| Co-morbidities               |                                                           |         |                  |         |
| Cancer                       | 1.22 (0.77-1.89)                                          | 0.38    | 0.84 (0.42-1.60) | 0.60    |
| CHF                          | 1.43 (0.96-2.12)                                          | 0.08    | 0.87 (0.48-1.51) | 0.62    |
| CKD                          | 0.81 (0.52-1.24)                                          | 0.33    | 1.55 (0.86-2.75) | 0.14    |
| CTD                          | 0.92 (0.44-1.74)                                          | 0.81    | 0.95 (0.33-2.18) | 0.91    |
| CVA                          | 1.71 (1.15-2.52)                                          | <0.01   | 0.98 (0.51-1.75) | 0.96    |
| Dementia                     | 2.00 (0.84-4.18)                                          | 0.09    | 1.85 (0.64-4.40) | 0.20    |
| Diabetes                     | 0.93 (0.65-1.31)                                          | 0.67    | 0.78 (0.45-1.31) | 0.35    |
| HIV                          | 0.34 (0.09-1.01)                                          | 0.07    | 1.98 (0.39-7.60) | 0.35    |
| Liver                        | 1.38 (0.86-2.16)                                          | 0.17    | 1.53 (0.76-2.92) | 0.21    |
| Pulmonary                    | 1.42 (1.02-1.95)                                          | 0.04    | 0.93 (0.56-1.48) | 0.75    |
| Vascular                     | 1.22 (0.83-1.77)                                          | 0.30    | 1.06 (0.58-1.83) | 0.85    |
| Transplant                   | 0.67 (0.36-1.20)                                          | 0.20    | 0.97 (0.40-2.06) | 0.93    |
| mCCMI <sup>a</sup>           | 1.04 (0.95-1.12)                                          | 0.40    | 1.01 (0.89-1.13) | 0.84    |
| Encounter Specific           |                                                           |         |                  |         |
| ID consult                   | 8.14 (5.93-11.22)                                         | <0.01   | 2.53 (1.52-4.13) | <0.01   |
| Shock                        | 0.70 (0.50-0.96)                                          | 0.03    | 0.92 (0.57-1.44) | 0.72    |
| Length of stay <sup>a</sup>  | 0.99 (0.98-0.99)                                          | 0.02    | 1.02 (1.01-1.03) | <0.01   |
| Alternative antibiotics      | 2.13 (1.57-2.89)                                          | <0.01   | 0.94 (0.59-1.49) | 0.81    |
| Antibiotics >72h             | 4.90 (3.49-6.92)                                          | <0.01   | 3.48 (2.15-5.56) | <0.01   |

**eTable 3: Interrupted time series analysis of antibiotic use by antibiotic class – Effect Estimates Accompanying Figure 1**

| <b>Model</b>                                   | <b>Use Rate Ratio (95% CI)</b> | <b>p-value</b> |
|------------------------------------------------|--------------------------------|----------------|
| <b>Non-penicillin Alternative<sup>a</sup></b>  |                                |                |
| Pre-intervention                               | 1.01 (0.94-1.08)               | 0.86           |
| Phase 1, level change                          | 0.85 (0.79-0.92)               | <0.01          |
| Phase 1, slope change                          | 0.87 (0.79-0.97)               | 0.01           |
| Phase 2, level change                          | 0.92 (0.86-0.98)               | 0.01           |
| Phase 2, slope change                          | 1.04 (0.97-1.12)               | 0.28           |
| <b>High CDI risk antibiotics<sup>b</sup></b>   |                                |                |
| Pre-intervention                               | 1.04 (0.99-1.10)               | 0.10           |
| Phase 1, level change                          | 0.95 (0.90-1.01)               | 0.09           |
| Phase 1, slope change                          | 0.91 (0.85-0.98)               | 0.01           |
| Phase 2, level change                          | 1.00 (0.96-1.05)               | 0.87           |
| Phase 2, slope change                          | 1.07 (1.01-1.12)               | 0.01           |
| <b>Narrow Spectrum Beta Lactam<sup>b</sup></b> |                                |                |
| Pre-intervention                               | 0.95 (0.89-1.02)               | 0.20           |
| Phase 1, level change                          | 1.06 (0.98-1.15)               | 0.14           |
| Phase 1, slope change                          | 1.08 (0.98-1.20)               | 0.12           |
| Phase 2, level change                          | 0.98 (0.91-1.04)               | 0.47           |
| Phase 2, slope change                          | 1.00 (0.99-1.01)               | 0.82           |

<sup>a</sup>Clindamycin, fluoroquinolones, aztreonam, aminoglycosides

<sup>b</sup>Clindamycin, fluoroquinolones, 3<sup>rd</sup> and 4<sup>th</sup> generation cephalosporins

<sup>c</sup>Amoxicillin±clavulanate, ampicillin±sulbactam, nafcillin, oxacillin, penicillin, and 1<sup>st</sup> or 2<sup>nd</sup> generation cephalosporins

**eFigure 1: Sensitivity analysis of interrupted time series analysis of high CDI risk antibiotics.**

Sensitivity analysis was conducted for confounding effect of the enhanced fluoroquinolone black box warning enacted in July 2016 by the US Food and Drug Administration (FDA), indicated here by the vertical dashed blue line. Grey shaded regions represent the staged intervention phases. Points represent actual antibiotic use in days of therapy per thousand patient days present. Dashed line represents modeled results from interrupted time series regression.

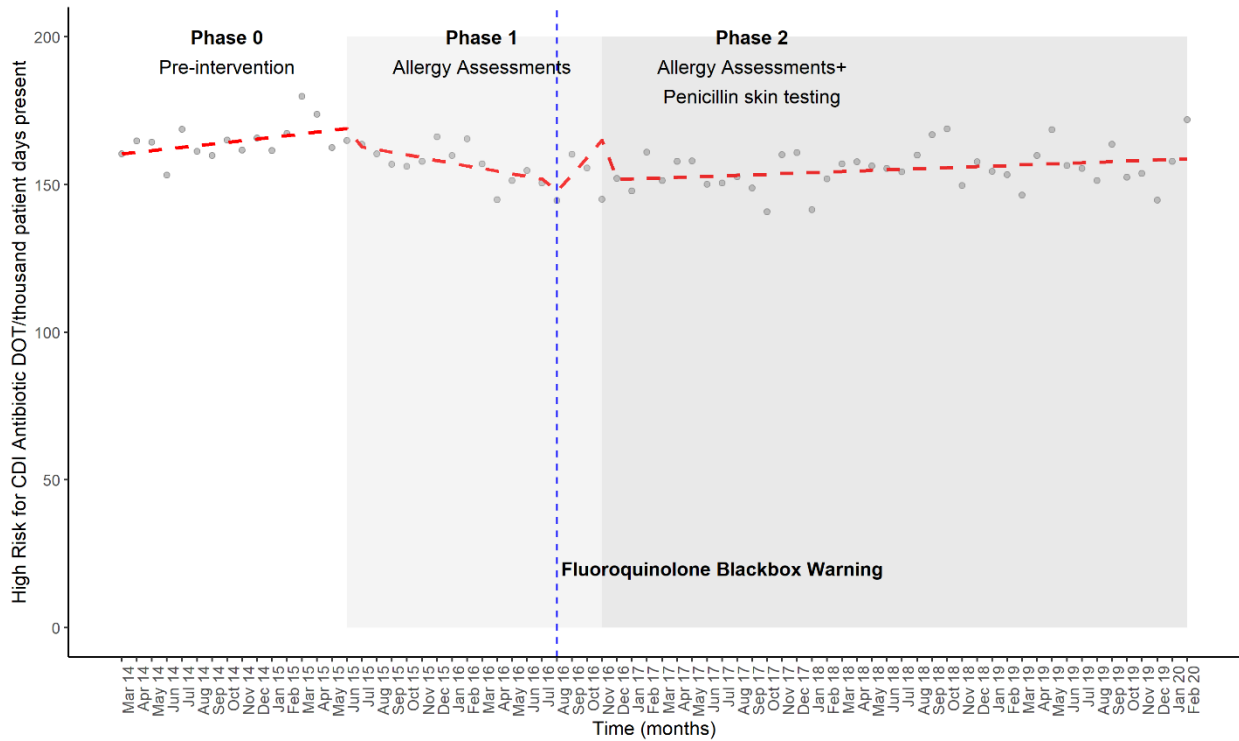

| Model                                | Use Rate Ratio (95% CI) | p-value |
|--------------------------------------|-------------------------|---------|
| <b>High risk for CDI antibiotics</b> |                         |         |
| Baseline time trend                  | 1.04 (0.99-1.09)        | 0.10    |
| Allergy assessment, level change     | 0.96 (0.91-1.02)        | 0.16    |
| Allergy assessment, slope change     | 0.89 (0.82-0.97)        | 0.01    |
| Penicillin skin test, level change   | 0.92 (0.82-1.03)        | 0.15    |
| Penicillin skin test, slope change   | 0.65 (0.34-1.24)        | 0.19    |
| Enhanced blackbox, level change      | 0.98 (0.90-1.06)        | 0.61    |
| Enhanced blackbox, slope change      | 0.78 (0.87-3.18)        | 0.12    |

**eFigure 2. Interrupted time series analysis by individual antibiotic classes.**

Sub-analysis of antibiotic use trends according to individual antibiotic classifications per table S1. Grey shaded regions represent the staged intervention phases. Points represent actual antibiotic use in days of therapy per thousand patient days present. Dashed lines represent modeled results from interrupted time series regression. Antibiotic class is delineated by line/point color.

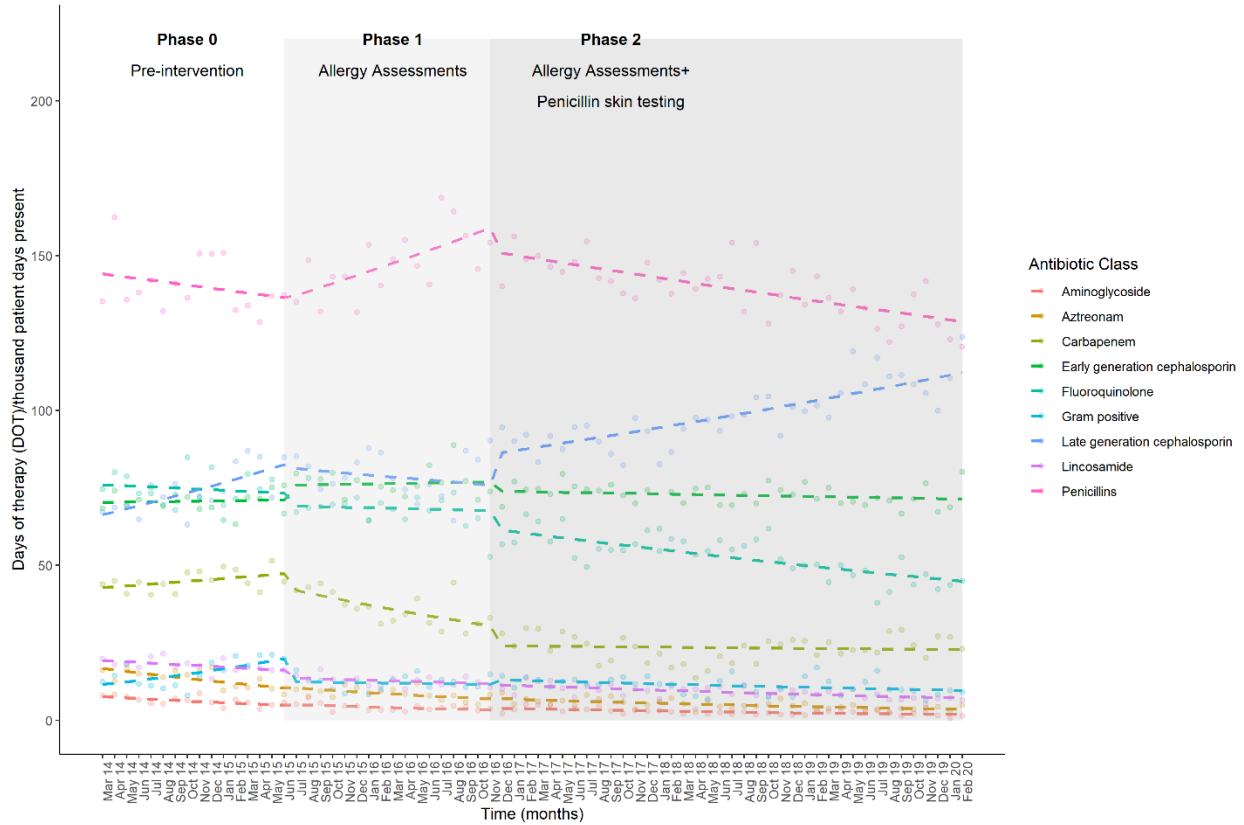

| Model                              | Use Rate Ratio (95% CI) | p-value |
|------------------------------------|-------------------------|---------|
| <b>Aminoglycosides</b>             |                         |         |
| Baseline time trend                | 0.69 (0.51-0.94)        | 0.02    |
| Allergy assessment, level change   | 1.05 (0.75-1.46)        | 0.80    |
| Allergy assessment, slope change   | 1.07 (0.69-1.64)        | 0.77    |
| Penicillin skin test, level change | 1.19 (0.88-1.60)        | 0.25    |
| Penicillin skin test, slope change | 1.06 (0.78-1.45)        | 0.72    |
| <b>Aztreonam</b>                   |                         |         |
| Baseline time trend                | 0.70 (0.53-0.89)        | <0.01   |
| Allergy assessment, level change   | 1.03 (0.78-1.35)        | 0.86    |
| Allergy assessment, slope change   | 1.08 (0.73-1.53)        | 0.77    |
| Penicillin skin test, level change | 1.04 (0.81-1.32)        | 0.47    |
| Penicillin skin test, slope change | 1.11 (0.84-1.46)        | 0.46    |

| <b>Model (cont'd)</b>                  | <b>Use Rate Ratio (95% CI)</b> | <b>p-value</b> |
|----------------------------------------|--------------------------------|----------------|
| <b>Carbapenems</b>                     |                                |                |
| Baseline time trend                    | 1.08 (0.89-1.31)               | 0.42           |
| Allergy assessment, level change       | 0.88 (0.72-1.09)               | 0.23           |
| Allergy assessment, slope change       | 0.73 (0.56-0.95)               | 0.02           |
| Penicillin skin test, level change     | 0.79 (0.66-0.94)               | 0.01           |
| Penicillin skin test, slope change     | 1.25 (1.03-1.52)               | 0.03           |
| <b>Fluoroquinolones</b>                |                                |                |
| Baseline time trend                    | 0.97 (0.89-1.07)               | 0.54           |
| Allergy assessment, level change       | 0.95 (0.85-1.05)               | 0.27           |
| Allergy assessment, slope change       | 1.01 (0.89-1.16)               | 0.84           |
| Penicillin skin test, level change     | 0.91 (0.84-0.99)               | 0.04           |
| Penicillin skin test, slope change     | 0.92 (0.84-1.01)               | 0.09           |
| <b>Early Generation Cephalosporins</b> |                                |                |
| Baseline time trend                    | 1.01 (0.94-1.08)               | 0.82           |
| Allergy assessment, level change       | 1.07 (0.99-1.15)               | 0.09           |
| Allergy assessment, slope change       | 1.00 (0.91-1.10)               | 0.98           |
| Penicillin skin test, level change     | 0.96 (0.90-1.03)               | 0.24           |
| Penicillin skin test, slope change     | 0.98 (0.91-1.05)               | 0.57           |
| <b>Late Generation Cephalosporins</b>  |                                |                |
| Baseline time trend                    | 1.19 (1.09-1.30)               | <0.01          |
| Allergy assessment, level change       | 0.97 (0.88-1.07)               | 0.53           |
| Allergy assessment, slope change       | 0.80 (0.78-0.90)               | <0.01          |
| Penicillin skin test, level change     | 1.13 (1.04-1.22)               | <0.01          |
| Penicillin skin test, slope change     | 1.14 (1.05-1.25)               | <0.01          |
| <b>Lincosamide (Clindamycin)</b>       |                                |                |
| Baseline time trend                    | 0.87 (0.74-1.02)               | 0.09           |
| Allergy assessment, level change       | 0.85 (0.71-1.02)               | 0.09           |
| Allergy assessment, slope change       | 1.03 (0.82-1.31)               | 0.78           |
| Penicillin skin test, level change     | 0.98 (0.84-1.15)               | 0.80           |
| Penicillin skin test, slope change     | 0.96 (0.81-1.14)               | 0.67           |
| <b>Gram positive agents</b>            |                                |                |
| Baseline time trend                    | 1.54 (1.19-2.00)               | <0.01          |
| Allergy assessment, level change       | 0.60 (0.45-0.81)               | <0.01          |
| Allergy assessment, slope change       | 0.61 (0.42-0.89)               | 0.01           |
| Penicillin skin test, level change     | 1.13 (0.88-1.46)               | 0.34           |
| Penicillin skin test, slope change     | 0.96 (0.73-1.26)               | 0.76           |
| <b>Penicillins</b>                     |                                |                |
| Baseline time trend                    | 0.96 (0.90-1.02)               | 0.19           |
| Allergy assessment, level change       | 1.01 (0.94-1.08)               | 0.80           |
| Allergy assessment, slope change       | 1.17 (1.06-1.28)               | <0.01          |
| Penicillin skin test, level change     | 0.95 (0.90-1.01)               | 0.12           |
| Penicillin skin test, slope change     | 0.85 (0.80-0.91)               | <0.01          |

**eTable 4. Interrupted time series analysis of hospital-associated *C. difficile* rates – Effect Estimates Accompanying Figure 2**

| <b>Model</b>                   | <b>Incident Rate Ratio (95% CI)</b> | <b>p-value</b> |
|--------------------------------|-------------------------------------|----------------|
| <b>Hospital-associated CDI</b> |                                     |                |
| Pre-intervention               | 1.85 (0.44-7.81)                    | 0.40           |
| Phase 1, level change          | 0.82 (0.49-1.37)                    | 0.45           |
| Phase 1, slope change          | 0.79 (0.18-3.44)                    | 0.76           |
| Phase 2, level change          | 0.35 (0.94-1.42)                    | 0.58           |
| Phase 2, slope change          | 0.61 (0.43-0.86)                    | <0.01          |



**eFigure 3.** Sensitivity Analysis for Potential Outlier Effect of October 2016-December 2016 HA-CDI Rates

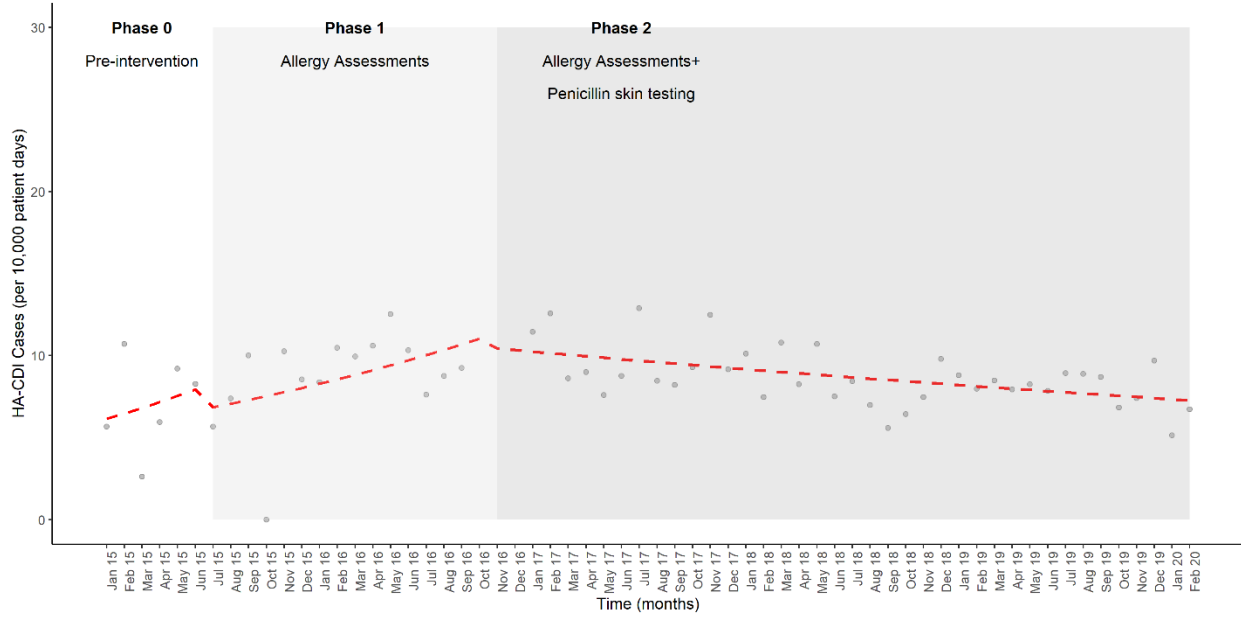

| Model                          | Incident Rate Ratio (95% CI) | p-value |
|--------------------------------|------------------------------|---------|
| <b>Hospital-associated CDI</b> |                              |         |
| Pre-intervention               | 1.05 (0.93-1.19)             | 0.40    |
| Phase 1, level change          | 0.82 (0.49-1.37)             | 0.45    |
| Phase 1, slope change          | 0.77 (0.87-1.11)             | 0.76    |
| Phase 2, level change          | 0.92 (0.68-1.24)             | 0.58    |
| Phase 2, slope change          | 0.96 (0.93-0.99)             | 0.01    |

**eFigure 4. Distribution of Propensity Scores\***

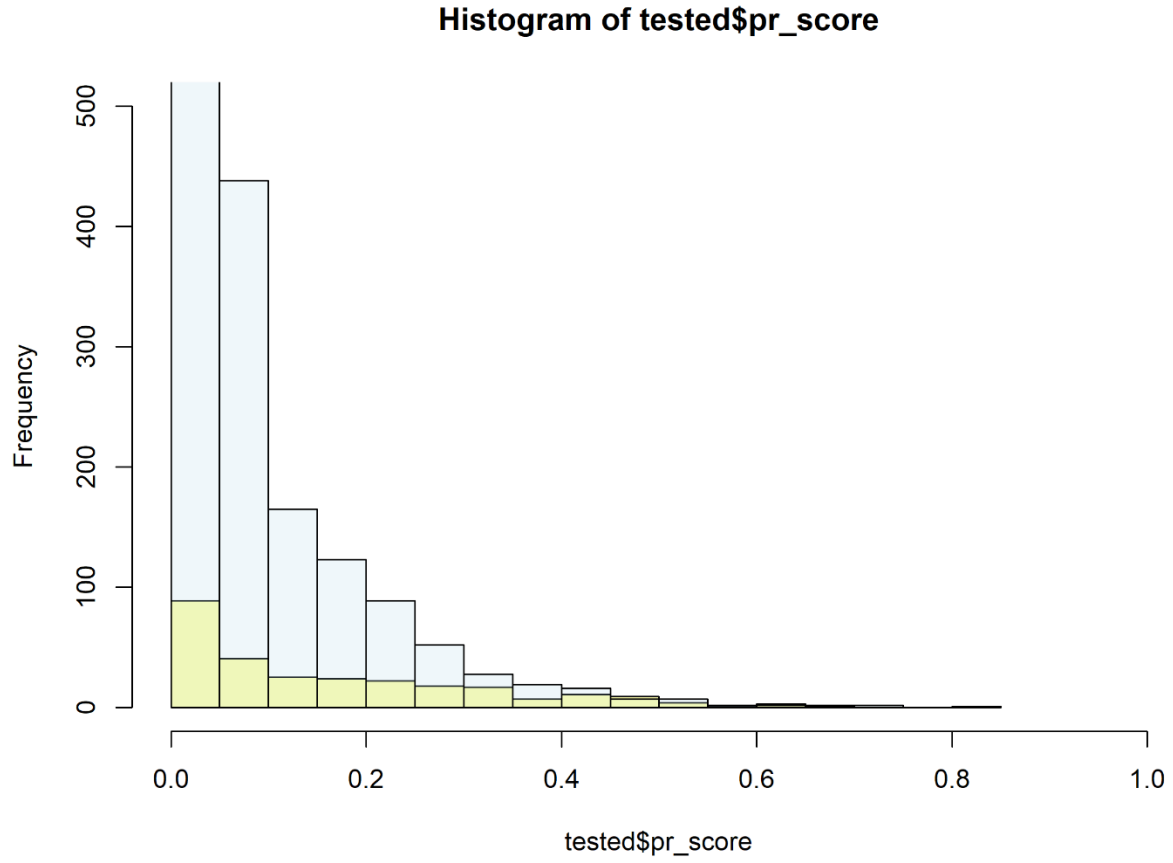

\*Green represents propensity score distribution for penicillin skin tested subjects; blue represents propensity score distribution for untested subjects.

**eTable 5. Inpatient and Discharge Antibiotic Selection Analyzed by Penicillin Allergy**

**Assessment Status**

| Antibiotics Received       | Unevaluated,<br>n=819 (%) | Evaluated,<br>n=272 (%) | OR, evaluated vs<br>unevaluated (95% CI) | P<br>value |
|----------------------------|---------------------------|-------------------------|------------------------------------------|------------|
| <b>Inpatient</b>           |                           |                         |                                          |            |
| Beta lactam                | 140 (17.1)                | 195 (71.7)              | 12.3 (9.0-17.0)                          | <0.01      |
| Non-beta lactam            | 645 (78.8)                | 237 (87.1)              | 1.83 (1.25-2.74)                         | <0.01      |
| High risk antibiotic       | 529 (64.6)                | 194 (71.3)              | 1.36 (1.01-1.85)                         | 0.04       |
| Aminoglycoside             | 17 (2.1)                  | 5 (1.8)                 | 0.88 (0.29-2.26)                         | 0.81       |
| Fluoroquinolone            | 307 (37.5)                | 89 (32.7)               | 0.81 (0.61-1.08)                         | 0.16       |
| Early gen<br>cephalosporin | 152 (18.6)                | 68 (25.0)               | 1.46 (1.05-2.02)                         | 0.02       |
| Late gen cephalosporin     | 328 (40.0)                | 119 (43.8)              | 1.16 (0.88-1.54)                         | 0.28       |
| Carbapenem                 | 85 (10.4)                 | 28 (10.3)               | 0.99 (0.62-1.54)                         | 0.97       |
| Lincosamide                | 154 (18.8)                | 52 (19.1)               | 1.02 (0.71-1.44)                         | 0.91       |
| Monobactam                 | 93 (11.4)                 | 66 (24.3)               | 2.50 (1.76-3.55)                         | <0.01      |
| Gram Positive Agents       | 472 (57.6)                | 186 (68.4)              | 1.59 (1.19-2.13)                         | <0.01      |
| Macrolide                  | 62 (7.6)                  | 18 (6.6)                | 0.87 (0.49-1.46)                         | 0.60       |
| Sulfa                      | 97 (11.8)                 | 31 (11.4)               | 0.96 (0.61-1.46)                         | 0.84       |
| Tetracyclines              | 46 (5.6)                  | 21 (7.7)                | 1.41 (0.81-2.37)                         | 0.21       |
| Other                      | 14 (1.7)                  | 6 (2.2)                 | 1.30 (0.46-3.27)                         | 0.60       |
| <b>Upon discharge</b>      |                           |                         |                                          |            |
| Beta lactam                | 16 (2.0)                  | 51 (18.8)               | 11.6 (6.62-21.33)                        | <0.01      |
| Non-beta lactam            | 282 (34.4)                | 125 (46.0)              | 1.62 (1.22-2.14)                         | <0.01      |
| High risk antibiotic       | 110 (36.9)                | 49 (27.8)               | 0.66 (0.44-0.98)                         | 0.04       |
| Aminoglycoside             | 0 (0.0)                   | 0 (0.0)                 | --                                       | --         |
| Fluoroquinolone            | 71 (8.7)                  | 32 (11.8)               | 1.40 (0.89-2.17)                         | 0.13       |
| Early gen<br>cephalosporin | 42 (5.1)                  | 26 (9.6)                | 1.96 (1.16-3.23)                         | <0.01      |
| Late gen cephalosporin     | 31 (3.8)                  | 16 (5.9)                | 1.59 (0.84-2.91)                         | 0.14       |
| Carbapenem                 | 14 (1.7)                  | 4 (1.5)                 | 0.86 (0.24-2.42)                         | 0.79       |
| Lincosamide                | 8 (1.0)                   | 1 (0.4)                 | 0.37 (0.02-2.05)                         | 0.36       |
| Monobactam                 | 1 (0.1)                   | 1 (0.4)                 | 3.02 (0.12-76.50)                        | 0.44       |
| Gram Positive Agents       | 36 (4.4)                  | 11 (4.0)                | 0.92 (0.44-1.77)                         | 0.81       |
| Macrolide                  | 2 (0.2)                   | 1 (0.4)                 | 1.51 (0.07-15.80)                        | 0.74       |
| Sulfa                      | 21 (2.6)                  | 14 (5.1)                | 2.06 (1.01-4.08)                         | 0.04       |
| Tetracyclines              | 26 (3.2)                  | 5 (1.8)                 | 0.57 (0.19-1.38)                         | 0.26       |
| Other                      | 30 (3.7)                  | 14 (5.1)                | 1.43 (0.72-2.68)                         | 0.28       |

**eTable 6. Inpatient and Outpatient Days of Therapy by Antibiotic and Penicillin Skin Testing Status**

| Days of Therapy                  | Untested, n=819 (%) | Tested, n=272 (%) | P value |
|----------------------------------|---------------------|-------------------|---------|
| <b>Inpatient</b>                 |                     |                   |         |
| Beta lactam                      | 1.1 (3.3)           | 2.9 (5.2)         | <0.01   |
| Non-beta lactam                  | 13.0 (16.5)         | 12.5 (13.0)       | 0.70    |
| High risk antibiotic             | 6.0 (9.2)           | 5.0 (7.0)         | 0.11    |
| Aminoglycoside                   | 0.1 (0.6)           | 0.1 (0.8)         | 0.57    |
| Fluoroquinolone                  | 1.8 (4.1)           | 1.4 (4.2)         | 0.16    |
| Early gen cephalosporin          | 0.8 (3.2)           | 1.0 (3.2)         | 0.23    |
| Late gen cephalosporin           | 2.8 (5.6)           | 2.5 (4.5)         | 0.39    |
| Carbapenem                       | 0.8 (3.3)           | 0.6 (2.6)         | 0.26    |
| Lincosamide                      | 0.6 (2.3)           | 0.5 (1.6)         | 0.93    |
| Monobactam                       | 0.7 (2.6)           | 1.0 (2.3)         | 0.08    |
| Gram Positive Agents             | 4.1 (7.1)           | 4.2 (5.8)         | 0.89    |
| Macrolide                        | 0.3 (1.8)           | 0.2 (1.0)         | 0.19    |
| Sulfa                            | 0.6 (2.5)           | 0.6 (2.6)         | 0.79    |
| Tetracyclines                    | 0.3 (1.9)           | 0.4 (2.3)         | 0.52    |
| Other                            | 0.1 (0.7)           | 0.1 (0.5)         | 0.63    |
| <b>Outpatient</b>                |                     |                   |         |
| Beta lactam                      | 0.6 (3.3)           | 4.4 (10.0)        | <0.01   |
| Non-beta lactam                  | 31.1 (71.1)         | 20.4 (21.8)       | 0.75    |
| High risk antibiotic             | 9.0 (25.1)          | 6.6 (17.5)        | 0.27    |
| Aminoglycoside                   | 0 (0)               | 0 (0)             | --      |
| Fluoroquinolone                  | 5.2 (23.9)          | 3.4 (9.3)         | 0.33    |
| Early gen cephalosporin          | 2.9 (9.0)           | 2.6 (8.4)         | 0.65    |
| Late gen cephalosporin           | 2.0 (7.3)           | 1.9 (7.4)         | 0.80    |
| Carbapenem                       | 1.3 (6.5)           | 1.3 (13.9)        | 0.98    |
| Lincosamide                      | 0.4 (3.2)           | 0.1 (0.8)         | 0.14    |
| Monobactam                       | 0.1 (2.1)           | 2.2 (29.8)        | 0.22    |
| Gram Positive Agents             | 4.0 (23.0)          | 1.8 (7.4)         | 0.22    |
| Macrolide                        | 1.2 (21.1)          | 0.0 (0.5)         | 0.45    |
| Sulfa                            | 3.7 (30.3)          | 7.2 (47.5)        | 0.33    |
| Tetracyclines                    | 31.1 (71.1)         | 20.4 (21.8)       | 0.75    |
| Other                            | 2.7 (22.0)          | 3.9 (28.8)        | 0.62    |
| <b>Total duration of therapy</b> | 9.3 (12.1)          | 9.8 (11.4)        | 0.62    |

\*Mean (SD)

**eTable 7. Cox Proportional hazard Estimates**

**A, Overall survival, Stratified by Penicillin Allergy Assessment (accompanying figure 4A)**

|          | Cox Proportional Hazard Modeling of Mortality |                  |                      |                   |                  |                      |
|----------|-----------------------------------------------|------------------|----------------------|-------------------|------------------|----------------------|
|          | Overall Cohort                                |                  |                      | Matched Cohort    |                  |                      |
|          | Unassessed                                    | Assessed         | HR (95% CI)          | Unassessed        | Assessed         | HR (95% CI)          |
| Survival | 2,329/11,308<br>(20.6)                        | 45/273<br>(16.5) | 0.86 (0.64-<br>1.16) | 225/819<br>(27.5) | 44/272<br>(16.2) | 0.77 (0.55-<br>1.07) |

**B, Stratified by Penicillin Allergy Assessment (accompanying figure 4B)**

|                           | Cox Proportional Hazard Modeling of HCFA-CDI Risk |                |                      |                 |             |                      |
|---------------------------|---------------------------------------------------|----------------|----------------------|-----------------|-------------|----------------------|
|                           | Overall Cohort                                    |                |                      | Matched Cohort  |             |                      |
|                           | Unassessed                                        | Assessed       | HR (95% CI)          | Unassessed      | Assessed    | HR (95% CI)          |
| HCFA CDI<br>Free Survival | 111/11,308<br>(1.0)                               | 4/273<br>(1.5) | 1.47 (0.54-<br>4.00) | 22/819<br>(2.7) | 4/272 (1.5) | 0.53 (0.18-<br>1.55) |
